# Supplementary material
Source: publisher figshare collection journal article supplement (https://aacr.figshare.com/ndownloader/files/39924393)
Supplement: Supplementary file 1 [file 39924393]

## Sheet: Co-NECvsCRC
	Supplementary Table 4
	Gene Set Name	Size	NES	Signalling Pathway
	GO_NEGATIVE_REGULATION_OF_SMALL_GTPASE_MEDIATED_SIGNAL_TRANSDUCTION	26	1.59587	EGFR/KRAS/BRAF/MEK
	AMIT_EGF_RESPONSE_240_MCF10A	17	1.76049	EGFR/KRAS/BRAF/MEK
	AMIT_EGF_RESPONSE_40_MCF10A	13	1.46864	EGFR/KRAS/BRAF/MEK
	REACTOME_SPRY_REGULATION_OF_FGF_SIGNALING	13	1.61415	EGFR/KRAS/BRAF/MEK
	NAGASHIMA_EGF_SIGNALING_UP	43	1.68884	EGFR/KRAS/BRAF/MEK
	KEGG_NOD_LIKE_RECEPTOR_SIGNALING_PATHWAY	29	1.49852	EGFR/KRAS/BRAF/MEK
	AMIT_EGF_RESPONSE_120_HELA	45	1.59008	EGFR/KRAS/BRAF/MEK
	GO_TOR_SIGNALING	12	1.70993	EGFR/KRAS/PI3K/mTOR
	GO_POSITIVE_REGULATION_OF_ACTIVATED_T_CELL_PROLIFERATION	12	1.47539	EGFR/KRAS/PI3K/mTOR
	KEGG_INOSITOL_PHOSPHATE_METABOLISM	35	1.39	EGFR/KRAS/PI3K/mTOR
	GO_POSITIVE_REGULATION_OF_MACROPHAGE_DIFFERENTIATION	11	1.46045	ILR/JAK/STAT
	GO_POSITIVE_REGULATION_OF_TYROSINE_PHOSPHORYLATION_OF_STAT3_PROTEIN	21	1.46536	ILR/JAK/STAT
	TARTE_PLASMA_CELL_VS_B_LYMPHOCYTE_DN	24	1.67537	ILR/JAK/STAT
	GO_RESPONSE_TO_INTERLEUKIN_4	15	1.38402	ILR/JAK/STAT
	GO_T_CELL_HOMEOSTASIS	20	1.4182	ILR/JAK/STAT
	GO_NATURAL_KILLER_CELL_ACTIVATION	17	1.40879	ILR/JAK/STAT
	GO_LYMPHOCYTE_HOMEOSTASIS	32	1.36712	ILR/JAK/STAT
	NATSUME_RESPONSE_TO_INTERFERON_BETA_UP	46	1.52361	ILR/JAK/STAT
	GO_ACTIVATION_OF_ADENYLATE_CYCLASE_ACTIVITY	22	1.46656	GPCR/PLC/AC/PKC
	GO_POSITIVE_REGULATION_OF_ADENYLATE_CYCLASE_ACTIVITY	28	1.4257	GPCR/PLC/AC/PKC
	KEGG_PHOSPHATIDYLINOSITOL_SIGNALING_SYSTEM	56	1.4582	GPCR/PLC/AC/PKC
	GO_POSITIVE_REGULATION_OF_CAMP_METABOLIC_PROCESS	48	1.36321	GPCR/PLC/AC/PKC
	REACTOME_DAG_AND_IP3_SIGNALING	19	1.40874	GPCR/PLC/AC/PKC
	REACTOME_INHIBITION_OF_INSULIN_SECRETION_BY_ADRENALINE_NORADRENALINE	12	-1.50771	GPCR/PLC/Ca++
	REACTOME_AMINE_LIGAND_BINDING_RECEPTORS	12	-1.67855	GPCR/PLC/Ca++
	REACTOME_G_PROTEIN_BETA_GAMMA_SIGNALLING	14	-1.46457	GPCR/PLC/Ca++
	REACTOME_VOLTAGE_GATED_POTASSIUM_CHANNELS	19	-1.55856	GPCR/PLC/Ca++
